# Supplementary material for: RIP140-Mediated NF-κB Inflammatory Pathway Promotes Metabolic Dysregulation in Retinal Pigment Epithelium Cells
Source: MDPI journal article supplement (doi:10.3390/cimb44110393), 2022-11-21
Supplement: s1 [file s1]

Table S1 Primer Sequences for real-time PCR

| Gene<br>Symbol       | Gene Name                                          | Forward Sequence (5'–3')      | Reverse Sequence (5'–3')    |
|----------------------|----------------------------------------------------|-------------------------------|-----------------------------|
| ATP5O                | ATP synthase subunit O                             | TTTGAATCCCTATGTGAA<br>GCGTT   | CCTTGGGTATTGCTTAAT<br>CGACC |
| ACADM                | Acyl-CoA dehydrogenase, C-4 to C-12 straight chain | ATGCCCTGGAAAGGAAA<br>ACT      | AACCTCCCAAGCTGCTCT<br>CT    |
| ApoA1                | Apolipoprotein A1                                  | GAGACTGCGAGAAGGAG<br>GTC      | TCTCTGCCGCTGTCTTTG<br>AG    |
| ApoB                 | Apolipoprotein B                                   | GAG AAA CTG ACT GCT<br>CTC AC | ATGATAGTGCTCATCAAG<br>ACT T |
| ApoE,                | Apolipoprotein E                                   | GTTGCTGGTCACATTCCT<br>GG      | GCAGGTAATCCCAAAAG<br>CGAC   |
| ACADM                | Acyl-CoA dehydrogenase, C-4 to C-12 straight chain | ATGCCCTGGAAAGGAAA<br>ACT      | AACCTCCCAAGCTGCTCT<br>CT    |
| COX4I1               | Cytochrome c oxidase subunit 4 isoform 1           | GCACTGAAGGAGAAGGA<br>GAAG     | AACCGTCTTCCACTCGTT<br>C     |
| COX5B                | Cytochrome c oxidase subunit 5B                    | GGAAGACCCTAATTTAGT<br>CCCCT   | CCAGCTTGTAATGGGCTC<br>CAC   |
| ERRα                 | Estrogen-related receptor alpha                    | TATGGTGTGGCATCCTGT<br>G       | GTCTCCGCTTGGTGATCT<br>C     |
| GAPDH (housekeeping) | Glyceraldehyde-3-phosphate dehydrogenase           | CGACCACTTTGTCAAGCT<br>CA      | AGGGGTCTACATGGCAA<br>CTG    |
| Glu1                 |                                                    | AACTCTTCAGCCAGGGTC<br>CAC     | CACAGTGAAGATGATGA<br>AGAC   |

|                |                                                                                                                 |                          |                         |
|----------------|-----------------------------------------------------------------------------------------------------------------|--------------------------|-------------------------|
| Glu4           | Glucose transporter isoform 4                                                                                   | CTTCGAGACAGCAGGGG TAG    | AGGAGCAGAGCCACAGT CAT   |
| HADH B         | Hydroxyacyl-CoA dehydrogenase/3-ketoacyl-CoA thiolase/enoyl-CoA hydratase (trifunctional protein), beta subunit | CTTGCTCCGAGAGGGAGT C     | AGCTCGTAGCTGGGAGG AAC   |
| IL-1 $\beta$   | Interleukin-1 $\beta$                                                                                           | CAACAGGCTGCTCTGGG ATT    | GGGCCATCAGCTTCAAA GAAC  |
| IL-6           | Interleukin-6                                                                                                   | ACTCACCTCTTCAGAACG AATTG | CCATCTTTGGAAGGTTCA GGTG |
| LDLR           | Low density lipoprotein receptor                                                                                | CTGGACCGGAGCGAGTA CAC    | TGGGTGCTGCAGATCATT CTC  |
| NRF1           | Nuclear respiratory factor 1                                                                                    | GCTGATGAAGACTCGCCT TCT   | TACATGAGGCCGTTTCCG TTT  |
| PGC-1 $\alpha$ | Peroxisome proliferator-activated receptor gamma, coactivator 1 alpha                                           | GTCACCACCCAAATCCTT AT    | ATCTACTGCCTGGAGACC TT   |
| PPAR $\alpha$  | Peroxisome proliferator-activated receptor alpha                                                                | ATCGAATGTAGAATCTGC GGG   | TCGCACTTGTCATACACC AG   |
| PPAR $\beta$   | Peroxisome proliferator-activated receptor beta                                                                 | CCAACAGATGAAGACAG ATGCA  | CTGAACGCAGATGGACC TCTA  |

|                  |                                                           |                           |                           |
|------------------|-----------------------------------------------------------|---------------------------|---------------------------|
| PPAR<br>$\alpha$ | Peroxisome<br>proliferator-<br>activated<br>receptor gama | AGGCGAGGGCGATCTTG<br>ACAG | GATGCGGATGGCCACCT<br>CTTT |
| TNF- $\alpha$    | tumor<br>necrosis<br>factor- $\alpha$                     | GCCCATGTTGTAGCAAAC<br>CC  | GGACCTGGGAGTAGATG<br>AGGT |

---
